# Supplementary material for: Patterns of Nucleotide Diversity at Photoperiod Related Genes in Norway Spruce [Picea abies (L.) Karst.]
Source: PubMed Central journal article supplement (PMC4014479; doi:10.1371/journal.pone.0095306), 2014-05-08

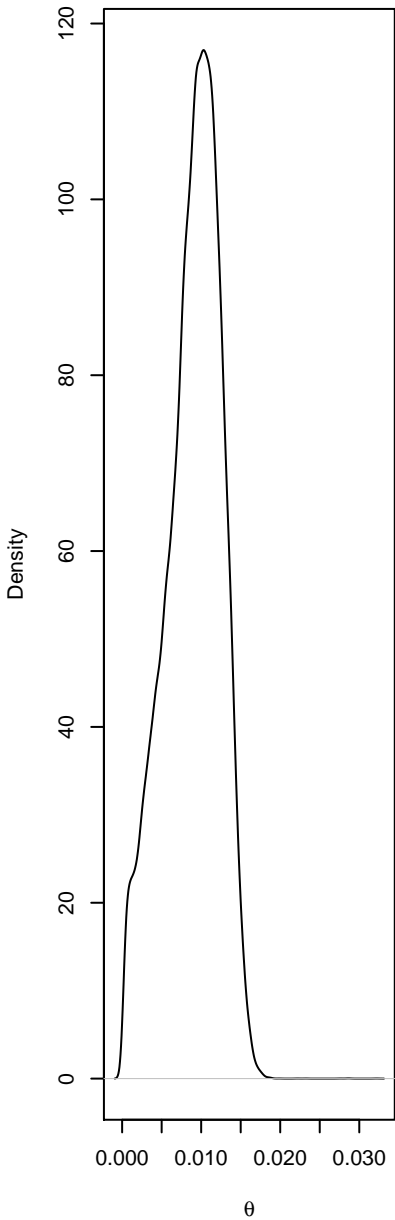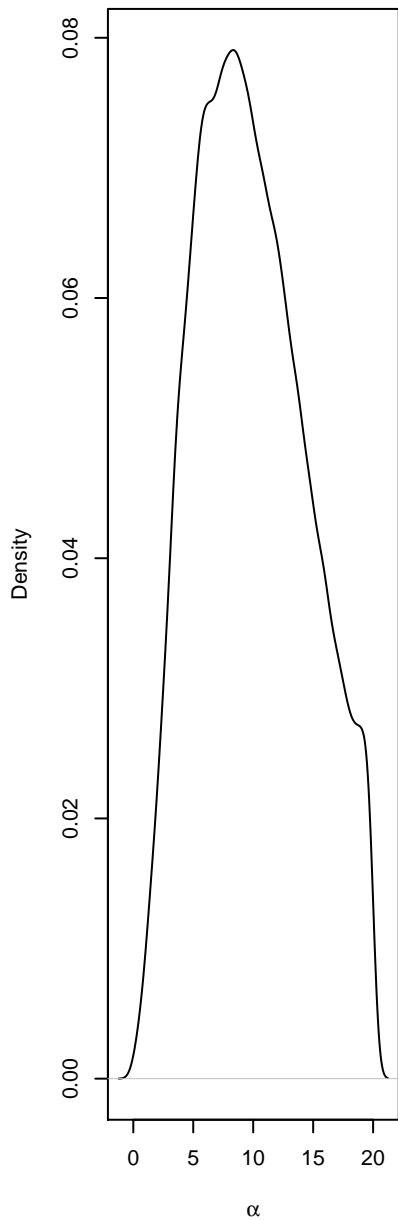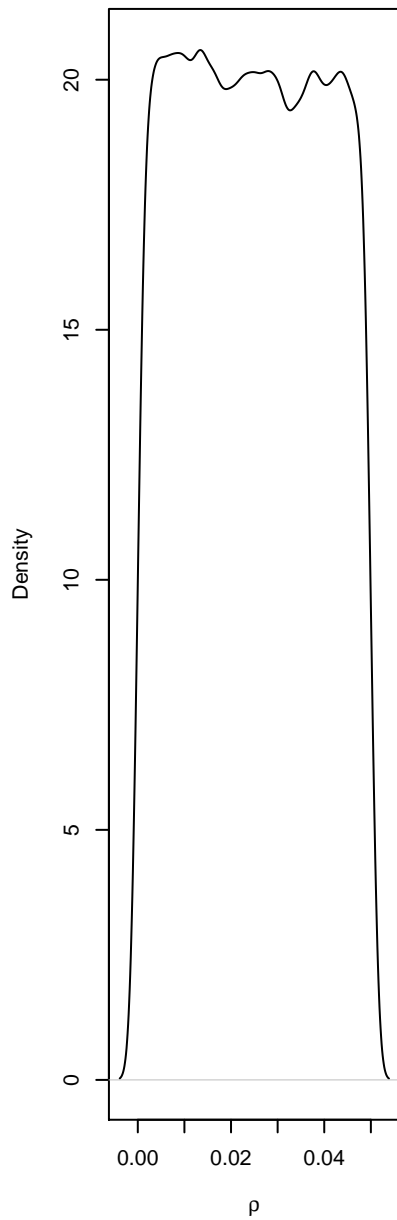

Supplement: pone.0095306.s003.pdf [file pone.0095306.s003.pdf]
